# Supplementary material for: BMAA, Methylmercury, and Mechanisms of Neurodegeneration in Dolphins: A Natural Model of Toxin Exposure
Source: MDPI journal article supplement (doi:10.3390/toxins13100697), 2021-10-01
Supplement: s1 [file s1]

**Supplementary Table S3:** Gene transcription Fold Change in Stranded Dolphins

| <i>PL</i>                   | <i>APP</i>         | <i>PSEN 1</i>      | <i>PSEN 2</i>      | <i>MAPT</i>        | <i>GRN</i>         | <i>TARDBP</i>      | <i>C9orf72</i>     |
|-----------------------------|--------------------|--------------------|--------------------|--------------------|--------------------|--------------------|--------------------|
| <sup>4</sup> IFAW 12-228 Dd | 0.91               | 1.02               | 0.99               | 1.04               | 1.03               | 0.99               | 1.05               |
| IFAW 12-223 Dd              | 0.95               | 1.50               | 0.96               | 1.44               | 1.05               | 1.77               | 1.73               |
| IFAW 12-200 Dd              | 0.74               | 0.78               | 0.98               | 0.96               | 0.74               | 0.71               | 0.67               |
| IFAW 12-198 Dd              | 1.10               | 1.79               | 1.22               | 1.27               | 0.77               | 2.84               | 2.67               |
| IFAW 12-229 Dd              | 1.23               | 1.56               | 1.21               | 1.92               | 1.01               | 1.64               | 1.47               |
| IFAW 12-205 Dd              | 0.84               | 1.07               | 0.89               | 1.28               | 1.00               | 1.68               | 1.51               |
| IFAW 12-201 Dd              | 0.71               | 0.86               | 0.89               | 1.10               | 1.02               | 1.11               | 1.08               |
| <b>Median (IQR)</b>         | <b>0.91 (0.36)</b> | <b>1.07 (0.70)</b> | <b>0.98 (0.32)</b> | <b>1.27 (0.40)</b> | <b>1.01 (0.26)</b> | <b>1.64 (0.78)</b> | <b>1.47 (0.68)</b> |
| <b>Min - Max</b>            | <b>0.71 – 1.23</b> | <b>0.78 – 1.79</b> | <b>0.89 – 1.22</b> | <b>0.96 – 1.92</b> | <b>0.74 – 1.05</b> | <b>0.71 – 2.84</b> | <b>0.67 – 2.67</b> |

| <i>OrL</i>                  | <i>APP</i>           | <i>PSEN 1</i>      | <i>PSEN 2</i>      | <i>MAPT</i>          | <i>GRN</i>         | <i>TARDBP</i>      | <i>C9orf72</i>     |
|-----------------------------|----------------------|--------------------|--------------------|----------------------|--------------------|--------------------|--------------------|
| <sup>4</sup> IFAW 12-228 Dd | 0.95                 | 1.01               | 0.98               | 1.04                 | 1.04               | 0.98               | 1.03               |
| IFAW 12-223 Dd              | 1.28                 | 1.31               | 1.09               | 1.79                 | 1.25               | 2.08               | 1.70               |
| IFAW 12-200 Dd              | 1.43                 | 1.04               | 1.24               | 1.84                 | 1.01               | 1.34               | 1.33               |
| IFAW 12-198 Dd              | 1.14                 | 1.18               | 1.09               | 1.42                 | 0.84               | 1.91               | 1.69               |
| IFAW 12-229 Dd              | 1.52                 | 1.40               | 1.17               | 2.63                 | 1.25               | 1.96               | 1.45               |
| IFAW 12-205 Dd              | 1.38                 | 1.27               | 0.96               | 2.24                 | 1.60               | 2.53               | 2.17               |
| IFAW 12-201 Dd              | 1.12                 | 1.26               | 0.94               | 1.16                 | 1.31               | 2.01               | 1.70               |
| <b>Median (IQR)</b>         | <b>1.28 (0.31) *</b> | <b>1.26 (0.27)</b> | <b>1.09 (0.21)</b> | <b>1.79 (1.08) *</b> | <b>1.25 (0.30)</b> | <b>1.96 (0.74)</b> | <b>1.69 (0.37)</b> |
| <b>Min - Max</b>            | <b>0.95 – 1.52</b>   | <b>1.01 – 1.40</b> | <b>0.94 – 1.24</b> | <b>1.04 – 2.63</b>   | <b>0.84 – 1.60</b> | <b>0.98 – 2.53</b> | <b>1.03 – 2.17</b> |

| <i>Cer</i>                  | <i>APP</i>         | <i>PSEN 1</i>      | <i>PSEN 2</i>      | <i>MAPT</i>        | <i>GRN</i>         | <i>TARDBP</i>      | <i>C9orf72</i>     |
|-----------------------------|--------------------|--------------------|--------------------|--------------------|--------------------|--------------------|--------------------|
| <sup>4</sup> IFAW 12-228 Dd | 0.94               | 0.98               | 0.98               | 0.98               | 0.99               | 0.99               | 0.95               |
| IFAW 12-223 Dd              | 0.92               | 1.32               | 0.85               | 1.14               | 0.94               | 1.99               | 1.03               |
| IFAW 12-200 Dd              | 1.13               | 1.21               | 1.03               | 1.12               | 0.88               | 1.57               | 1.34               |
| IFAW 12-198 Dd              | 1.31               | 2.94               | 1.21               | 1.14               | 1.16               | 2.92               | 2.69               |
| IFAW 12-229 Dd              | 1.03               | 1.01               | 1.13               | 1.46               | 1.00               | 1.41               | 1.03               |
| IFAW 12-205 Dd              | 1.00               | 1.22               | 0.79               | 1.20               | 1.03               | 2.13               | 2.01               |
| IFAW 12-201 Dd              | 1.01               | 1.08               | 0.90               | 1.69               | 0.95               | 1.93               | 1.91               |
| <b>Median (IQR)</b>         | <b>1.01 (0.19)</b> | <b>1.21 (0.31)</b> | <b>0.98 (0.28)</b> | <b>1.14 (0.34)</b> | <b>0.99 (0.09)</b> | <b>1.93 (0.72)</b> | <b>1.34 (0.98)</b> |
| <b>Min - Max</b>            | <b>0.92 – 1.31</b> | <b>0.98 – 2.94</b> | <b>0.79 – 1.21</b> | <b>0.98 – 1.69</b> | <b>0.88 – 1.16</b> | <b>0.99 – 2.92</b> | <b>0.95 – 2.69</b> |

*Cer*: cerebellum; *PL*: parietal Lobe; *OrL*: orbital Lobe; <sup>4</sup>: Dolphin used for normalization of qPCR data; \**P*<0.05 ANOVA
