# Supplementary material for: BMAA, Methylmercury, and Mechanisms of Neurodegeneration in Dolphins: A Natural Model of Toxin Exposure
Source: MDPI journal article supplement (doi:10.3390/toxins13100697), 2021-10-01
Supplement: s1 [file s1]

**Supplementary Table S1:** Stranded Dolphins

| No. | Common Name                 | Species           | Agency ID      | Observed | Stranding Date | Stranding Location | Necropsy Findings | Sex | Age Class | Length (cm) | Weight (kg) | RIN |
|-----|-----------------------------|-------------------|----------------|----------|----------------|--------------------|-------------------|-----|-----------|-------------|-------------|-----|
| 1   | Short-Beaked Common Dolphin | <i>D. delphis</i> | IFAW 12-198 Dd | Beached  | 03/06/12       | Power's Landing    | Unknown           | F   | Adult     | 186         | 77          | 9.3 |
| 2   | Short-Beaked Common Dolphin | <i>D. delphis</i> | IFAW 12-200 Dd | Beached  | 03/07/12       | Corporation Beach  | Unknown           | M   | Subadult  | 157         | 42          | 9.8 |
| 3   | Short-Beaked Common Dolphin | <i>D. delphis</i> | IFAW 12-201 Dd | Beached  | 03/09/12       | Skaget Beach       | Unknown           | F   | Adult     | 206         | 103         | 9.7 |
| 4   | Short-Beaked Common Dolphin | <i>D. delphis</i> | IFAW 12-205 Dd | Beached  | 03/11/12       | Duck Creek         | Unknown           | F   | Subadult  | 167         | 57          | 9.2 |
| 5   | Short-Beaked Common Dolphin | <i>D. delphis</i> | IFAW 12-223 Dd | Beached  | 03/12/12       | Skaget Beach       | Brucellosis       | M   | Subadult  | 185         | N/A         | 9.6 |
| 6   | Short-Beaked Common Dolphin | <i>D. delphis</i> | IFAW 12-228 Dd | Beached  | 04/05/12       | Black Fish Creek   | Brucellosis       | M   | Adult     | 211         | 86          | 9.2 |
| 7   | Short-Beaked Common Dolphin | <i>D. delphis</i> | IFAW 12-229 Dd | Swimming | 04/03/12       | Black Fish Creek   | Brucellosis       | M   | Subadult  | 181         | N/A         | 9.9 |

**cm:** centimeters; **F:** female; **kg:** kilograms; **M:** male; **N/A:** data not available; **RIN:** RNA integrity number;
