# Supplementary material for: BMAA, Methylmercury, and Mechanisms of Neurodegeneration in Dolphins: A Natural Model of Toxin Exposure
Source: MDPI journal article supplement (doi:10.3390/toxins13100697), 2021-10-01
Supplement: s1 [file s1]

**Supplementary Table S2:** Dolphin qPCR primers

| Gene Symbol    | Name                               | Assay ID | Protein in Dolphins                                        | Protein in Humans                   | Associated Disease in Humans | Assay Name | SeqAC          | Transcript variant | Amplicon Length | Location |
|----------------|------------------------------------|----------|------------------------------------------------------------|-------------------------------------|------------------------------|------------|----------------|--------------------|-----------------|----------|
| <i>APP</i>     | Amyloid Beta Precursor Protein     | APGZHYX  | Amyloid-beta A4 protein                                    | Amyloid Beta Precursor Protein      | AD                           | APP_1      | XM_019922563.1 | X1                 | 64              | 550      |
|                |                                    | APGZHYX  |                                                            |                                     |                              | APP_1      | XM_019922564.1 | X2                 | 64              | 550      |
| <i>C9orf72</i> | Chromosome 9 Open Reading Frame 72 | APKA64T  | Guanine Nucleotide Exchange C9orf72 Homolog Isoform X1, X2 | Guanine nucleotide exchange C9orf72 | ALS; FTD                     | C9ORF72_1  | XM_004318999.2 | ---                | 61              | 817      |
| <i>GRN</i>     | Granulin Precursor                 | APRWHFG  | Progranulin Isoform X1, X2                                 | Progranulin                         | AD; FTD                      | GRN_1      | XM_019939325.1 | ----               | 64              | 158      |
| <i>MAPT</i>    | Microtubule Associated Protein Tau | APU66KC  | Microtubule-Associated Protein Tau                         | Microtubule-Associated Protein Tau  | AD; ALS/PDC; FTD; PART       | MAPT_1     | XM_019944330.1 | X1                 | 59              | 397      |
|                |                                    | APU66KC  |                                                            |                                     |                              | MAPT_1     | XM_019944331.1 | X2                 | 59              | 397      |
|                |                                    | APU66KC  |                                                            |                                     |                              | MAPT_1     | XM_019944332.1 | X3                 | 59              | 310      |
|                |                                    | APU66KC  |                                                            |                                     |                              | MAPT_1     | XM_019944333.1 | X4                 | 59              | 397      |
|                |                                    | APU66KC  |                                                            |                                     |                              | MAPT_1     | XM_019944334.1 | X5                 | 59              | 397      |
|                |                                    | APU66KC  |                                                            |                                     |                              | MAPT_1     | XM_019944335.1 | X6                 | 59              | 310      |
|                |                                    | APU66KC  |                                                            |                                     |                              | MAPT_1     | XM_019944336.1 | X7                 | 59              | 397      |
|                |                                    | APU66KC  |                                                            |                                     |                              | MAPT_1     | XM_019944337.1 | X8                 | 59              | 310      |
|                |                                    | APU66KC  |                                                            |                                     |                              | MAPT_1     | XM_019944338.1 | X9                 | 59              | 110      |
|                |                                    | APU66KC  |                                                            |                                     |                              | MAPT_1     | XM_019944339.1 | X10                | 59              | 110      |
| <i>PSEN1</i>   | Presenilin 1                       | APYMNA3  | Presenilin                                                 | Presenilin-1                        | AD                           | PSEN1_2    | XM_019921707.1 | X1                 | 67              | 1855     |
|                |                                    | APYMNA3  |                                                            |                                     |                              | PSEN1_2    | XM_019921714.1 | X2                 | 67              | 1843     |
| <i>PSEN2</i>   | Presenilin 2                       | AP2XCFX  | Presenilin                                                 | Presenilin-2                        | AD                           | PSEN2_2    | XM_019920287.1 | ---                | 55              | 1812     |
| <i>TARDBP</i>  | TAR DNA Binding Protein            | AP7DT6P  | TAR DNA-binding protein 43                                 | TAR DNA-binding protein 43          | AD, ALS, FTD, LATE           | TARDBP_1   | XM_019930884.1 | X1                 | 67              | 822      |
|                |                                    | AP7DT6P  |                                                            |                                     |                              | TARDBP_1   | XM_019930886.1 | X3                 | 67              | 801      |
| <i>RPS9</i>    | 40S Ribosomal Protein S9           | AP324ZV  | 40S ribosomal protein S9                                   | 40S ribosomal protein S9            | House Keeping Gene           | RPS9_1     | EU638309.1     | partial cds        | 55              | 67       |
|                |                                    | AP324ZV  |                                                            |                                     |                              | RPS9_1     | XM_019927380.1 | X1                 | 55              | 207      |
|                |                                    | AP324ZV  |                                                            |                                     |                              | RPS9_1     | XM_004332149.2 | X2                 | 55              | 124      |
|                |                                    | AP324ZV  |                                                            |                                     |                              | RPS9_1     | XM_019927381.1 | X3                 | 55              | 329      |
