# Supplementary material for: BMAA, Methylmercury, and Mechanisms of Neurodegeneration in Dolphins: A Natural Model of Toxin Exposure
Source: Toxins (Basel). 2021 Oct 1;13(10):697. doi: 10.3390/toxins13100697 (PMC8540894; doi:10.3390/toxins13100697)
Supplement: Supplementary file 1 [file toxins-13-00697-s001.zip]

Archive with 4 entries (4 files):
- Davis et al 2021 Supplementary Figure S1 Toxins .pdf
- Davis et al 2021 Supplementary Table S1 Toxins.pdf
- Davis et al 2021 Supplementary Table S2 Toxins.pdf
- Davis et al 2021 Supplementary Table S3 Toxins .pdf
